# Supplementary material
Source: ML conference proceedings conference paper supplement (https://proceedings.mlr.press/v119/sakryukin20a.html)
Supplement: Supplementary file 1 [file sakryukin20a-supp.pdf]

# Appendix

## 1 Uncertainties

### 1.1 $u^\sigma$ uncertainties

Here we present the  $u^\sigma$  values obtained from training the MuJoCo environments with parallel module composition. The results can be seen in Figure 1.

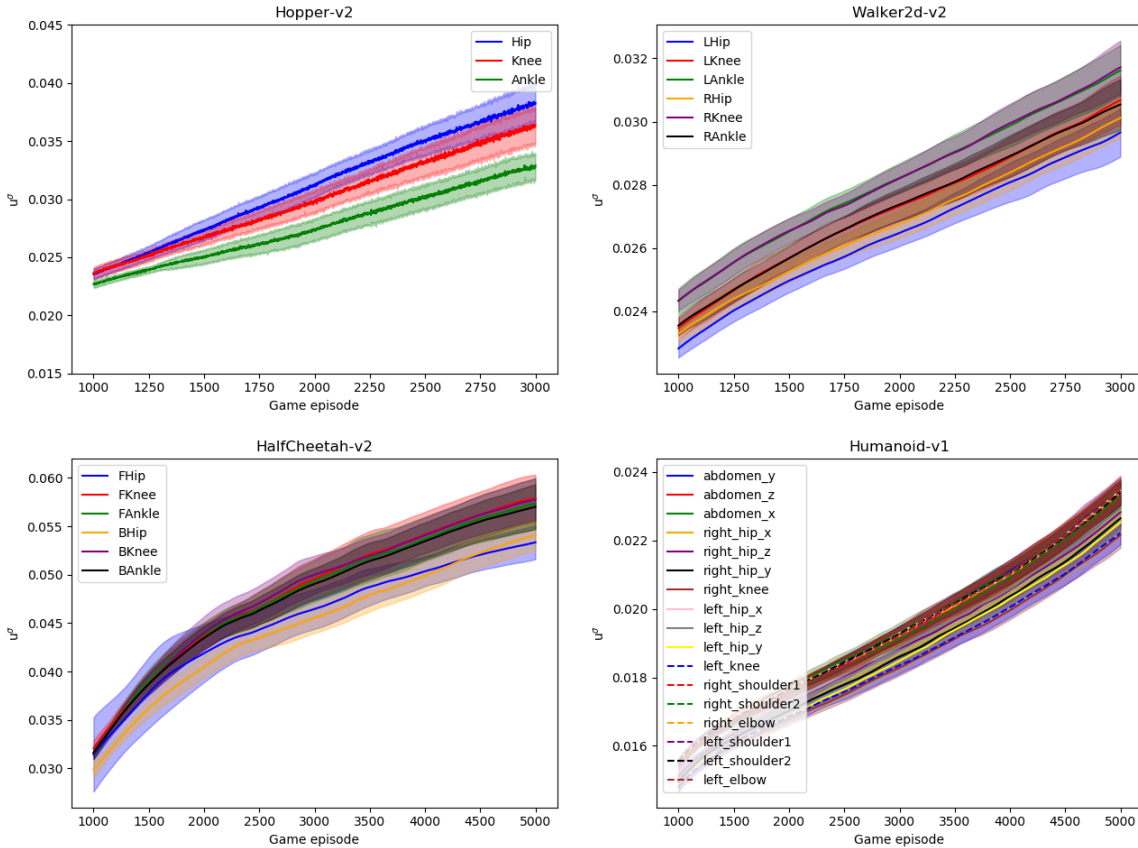

Figure 1:  $u^\sigma$  uncertainties for MuJoCo environments

### 1.2 $u^q$ uncertainties

Here we present the  $u^q$  values obtained from training the MuJoCo environments with parallel module composition. The results can be seen in Figure 2.

## 2 Inferred structures

In Table 1 we present the compositional structures inferred from  $u^\sigma$  and  $u^q$  values. In Table 2 we present the configuration used to estimate the effect of the module composition.

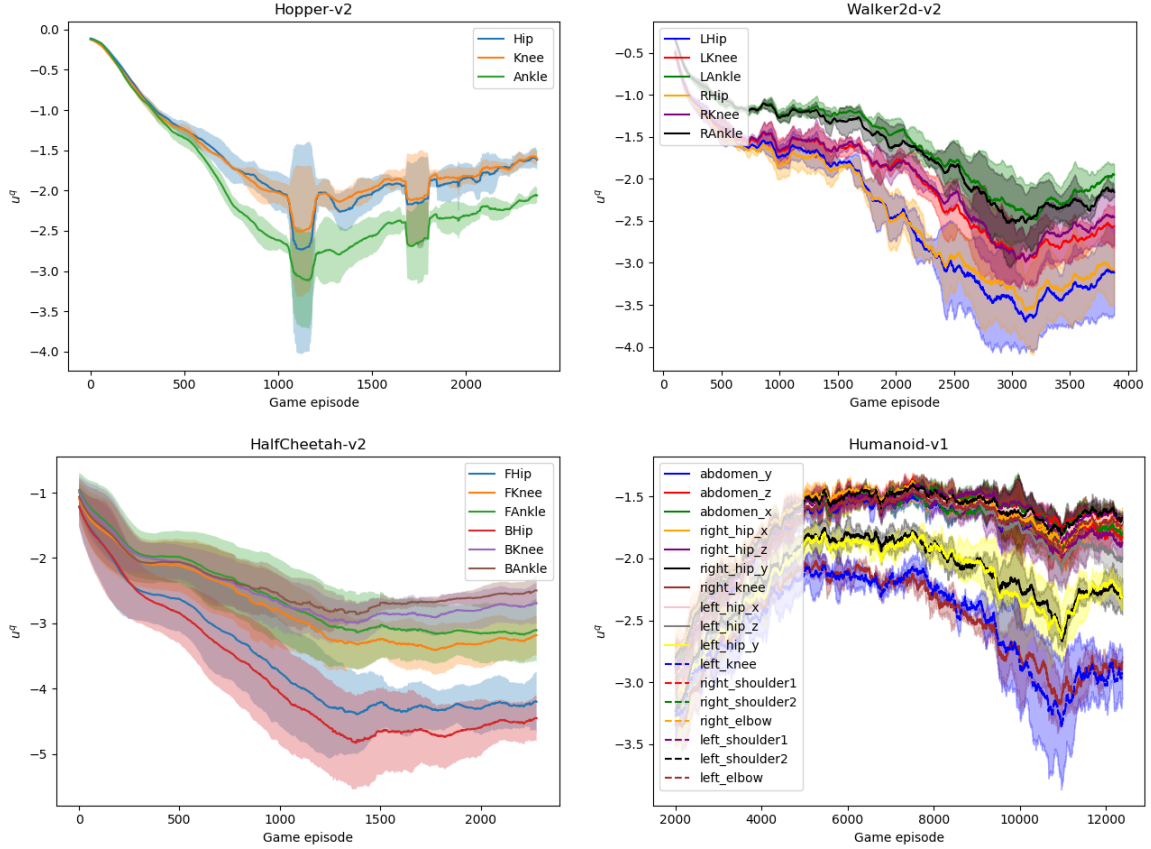

Figure 2:  $u^\sigma$  uncertainties for MuJoCo environments

|          | $u^\sigma$                                                                                                                                                                                                                                                                                                 | $u^q$                                                                                                                                                                                                                                                                                                  |
|----------|------------------------------------------------------------------------------------------------------------------------------------------------------------------------------------------------------------------------------------------------------------------------------------------------------------|--------------------------------------------------------------------------------------------------------------------------------------------------------------------------------------------------------------------------------------------------------------------------------------------------------|
| Hopper   | $\{\{\text{Ankle}\}, \{\text{Knee}, \text{Hip}\}\}$                                                                                                                                                                                                                                                        | $\{\{\text{Ankle}\}, \{\text{Knee}, \text{Hip}\}\}$                                                                                                                                                                                                                                                    |
| Walker2d | $\{\{\text{LHip}\}, \{\text{RHip}\}, \{\text{LKnee}, \text{RAnkle}\}, \{\text{LAnkle}, \text{RKnee}\}\}$                                                                                                                                                                                                   | $\{\{\text{LHip}, \text{RHip}\}, \{\text{LKnee}, \text{RKnee}\}, \{\text{LAnkle}, \text{RAnkle}\}\}$                                                                                                                                                                                                   |
| Cheetah  | $\{\{\text{FHip}, \text{BHip}\}, \{\text{FKnee}, \text{BKnee}, \text{FAnkle}, \text{BAnkle}\}\}$                                                                                                                                                                                                           | $\{\{\text{FHip}, \text{BHip}\}, \{\text{FKnee}, \text{BKnee}, \text{FAnkle}, \text{BAnkle}\}\}$                                                                                                                                                                                                       |
| Humanoid | $\{\{\text{RKnee}, \text{LKnee}\}, \{\text{RHip}_y, \text{LHip}_y\}, \{\text{RHip}_z, \text{LHip}_z\}, \{\text{Abdomen}_x, \text{Abdomen}_y, \text{Abdomen}_z, \text{RHip}_x, \text{RShoulder1}, \text{RShoulder2}, \text{LHip}_x, \text{LShoulder1}, \text{LShoulder2}, \text{RElbow}, \text{LElbow}\}\}$ | $\{\{\text{RKnee}, \text{LKnee}\}, \{\text{RHip}_y, \text{LHip}_y\}, \{\text{Abdomen}_x, \text{Abdomen}_y, \text{Abdomen}_z, \text{RHip}_x, \text{RHip}_z, \text{RShoulder2}, \text{LHip}_z, \text{RShoulder1}, \text{LHip}_x, \text{LShoulder1}, \text{LShoulder2}, \text{RElbow}, \text{LElbow}\}\}$ |

Table 1: Module composition structures (c) obtained as a result of clustering uncertainty estimations based on  $u^\sigma$  and  $u^q$  values.

|          | Real                                                                                                                                                                                                                                                        | Inversed $u^\sigma$                                                                                                                                                                                                                              | Inversed $u^q$                                                                                                                                                                                                                                   |
|----------|-------------------------------------------------------------------------------------------------------------------------------------------------------------------------------------------------------------------------------------------------------------|--------------------------------------------------------------------------------------------------------------------------------------------------------------------------------------------------------------------------------------------------|--------------------------------------------------------------------------------------------------------------------------------------------------------------------------------------------------------------------------------------------------|
| Hopper   | $\{\{\text{Hip}\},\{\text{Knee}\},\{\text{Ankle}\}\}$                                                                                                                                                                                                       | $\{\{\text{Knee,Hip}\},\{\text{Ankle}\}\}$                                                                                                                                                                                                       | $\{\{\text{Knee,Hip}\},\{\text{Ankle}\}\}$                                                                                                                                                                                                       |
| Walker2d | $\{\{\text{LHip,RHip}\},\{\text{LKnee,RKnee}\},\{\text{LAnkle,LAnkle}\}\}$                                                                                                                                                                                  | $\{\{\text{LAnkle,RKnee}\},\{\text{LKnee,RAnkle}\},\{\text{RHip}\},\{\text{LHip}\}\}$                                                                                                                                                            | $\{\{\text{LAnkle,RAnkle}\},\{\text{LKnee,RKnee}\},\{\text{LHip,RHip}\}\}$                                                                                                                                                                       |
| Cheetah  | $\{\{\text{FHip,BHip}\},\{\text{FKnee,BKnee}\},\{\text{FAnkle, BAnkle}\}\}$                                                                                                                                                                                 | $\{\{\text{FKnee,BKnee, FAnkle, BAnkle}\},\{\text{FHip,BHip}\}\}$                                                                                                                                                                                | $\{\{\text{FKnee,BKnee, FAnkle, BAnkle}\},\{\text{FHip,BHip}\}\}$                                                                                                                                                                                |
| Humanoid | $\{\{\text{RKnee,LKnee}\},\{\text{RHip}_x,\text{LHip}_x,\text{RHip}_y,\text{LHip}_y,\text{RHip}_z,\text{LHip}_z\},\{\text{Abdomen}_x,\text{Abdomen}_y,\text{Abdomen}_z\},\{\text{RShoulder1,RShoulder2,LShoulder1,LShoulder2}\},\{\text{RElbow,LElbow}\}\}$ | $\{\{\text{Abdomen}_x,\text{Abdomen}_y,\text{Abdomen}_z,\text{RHip}_x,\text{RShoulder1,RShoulder2,LHip}_x,\text{LShoulder1,LShoulder2,RElbow,LElbow}\},\{\text{RHip}_z,\text{LHip}_z\},\{\text{RHip}_y,\text{LHip}_y\},\{\text{RKnee,LKnee}\}\}$ | $\{\{\text{Abdomen}_x,\text{Abdomen}_y,\text{Abdomen}_z,\text{RHip}_x,\text{RHip}_z,\text{RShoulder2,LHip}_z,\text{RShoulder1,LHip}_x,\text{LShoulder1,LShoulder2,RElbow,LElbow}\},\{\text{RHip}_y,\text{LHip}_y\},\{\{\text{RKnee,LKnee}\}\}\}$ |

Table 2: Module composition structures (c) used to estimate the effect of the compositional structure.
